# Supplementary material
Source: Springer Nature journal article supplement (https://www.springermedizin.de/resource/supplementary/12939_2012_296_MOESM1_ESM.pdf/9550818)
Supplement: MOESM1 [file 9550818]

**Table 1: Selected characteristics, study population compared to the Victoria Census Metropolitan Area (CMA), 2006. Income is in Canadian dollars (CAD).**

| <b>Measure</b>               | <b>Sample population</b> | <b>Victoria CMA</b>                                  |
|------------------------------|--------------------------|------------------------------------------------------|
| Aboriginal background        | 4.5%                     | 2.8% (females)                                       |
| Visible minorities           | 11.2%                    | 9.0% (females)                                       |
| Average (mean) annual income | \$52,565                 | \$66,594                                             |
| Gross household income       | \$53,500 (median)        | \$59,015 (median)                                    |
| Own home                     | 40.4%                    | 61.8% (by household, not specific for age or gender) |
